# Supplementary material for: Externally induced frontoparietal synchronization modulates network dynamics and enhances working memory performance
Source: eLife. 2017 Mar 14;6:e22001. doi: 10.7554/eLife.22001 (PMC5349849; doi:10.7554/eLife.22001)
Supplement: Figure 1—source data 1. — DOI: http://dx.doi.org/10.7554/eLife.22001.004 [file elife-22001-fig1-data1.xlsx]

## Sheet: Sheet1
	CRT			1-back			2-back
Subject#	0°	180°	sham	0°	180°	sham	0°	180°	sham
1	0.372658	0.389456	0.366641	0.460442	0.442461	0.413986	0.518485	0.65625	0.457712
2	0.322439	0.324705	0.333896	0.504553	0.484706	0.500519	0.517388	0.539096	0.489958
3	0.3088	0.302776	0.319747	0.542852	0.722771	0.680344	0.668793	0.780684	0.6847
4	0.325291	0.327399	0.321572	0.449296	0.416311	0.480031	0.5454	0.639122	0.641151
5	0.361843	0.382663	0.36585	0.642904	0.661103	0.674258	0.662373	0.68285	0.646234
6	0.42007	0.489902	0.501868	0.970214	0.998777	0.862556	0.892462	1.05487	0.972205
7	0.399154	0.4021	0.397541	0.465692	0.472185	0.482195	0.5071	0.555304	0.626563
8	0.38693	0.428673	0.358765	0.662398	0.651533	0.726097	0.729808	0.819254	0.861402
9	0.312693	0.31928	0.309349	0.451206	0.497063	0.456513	0.512847	0.678052	0.69219
10	0.336702	0.324388	0.341277	0.548583	0.645506	0.635961	0.506982	0.656993	0.772154
