# Supplementary material for: Externally induced frontoparietal synchronization modulates network dynamics and enhances working memory performance
Source: eLife. 2017 Mar 14;6:e22001. doi: 10.7554/eLife.22001 (PMC5349849; doi:10.7554/eLife.22001)
Supplement: Figure 3—source data 3. — DOI: http://dx.doi.org/10.7554/eLife.22001.010 [file elife-22001-fig3-data3.xlsx]

## Sheet: Sheet1
Subject#	RT	PE
1	0.591156	63.4964
2	0.606363	47.4651
3	0.602789	101.124
4	0.653976	-3.7579
5	0.584865	63.7191
6	0.557297	10.2836
7	0.74715	33.2781
8	0.870343	44.1726
9	0.741404	36.8994
10	0.619034	42.2629
11	0.858353	28.9756
12	0.665213	51.325
13	0.579218	75.9893
14	0.484267	106.642
15	0.704395	93.7744
16	0.67987	74.3193
17	0.48977	57.881
18	0.570216	55.1641
19	0.544463	94.7538
20	0.748582	27.8583
21	0.723366	62.9967
