# Supplementary material for: Externally induced frontoparietal synchronization modulates network dynamics and enhances working memory performance
Source: eLife. 2017 Mar 14;6:e22001. doi: 10.7554/eLife.22001 (PMC5349849; doi:10.7554/eLife.22001)
Supplement: Figure 4—source data 3. — DOI: http://dx.doi.org/10.7554/eLife.22001.014 [file elife-22001-fig4-data3.xlsx]

## Sheet: Sheet1
	tACS 0 > tACS OFF				tACS 180 > tACS OFF
Subject#	IPL	SFG	OFC		IPL	SFG	OFC
1	-11.7441	-5.73898	-5.53606		-18.8639	-11.1919	-9.29193
2	12.9825	7.33286	2.76335		11.2777	4.38634	-5.77222
3	11.9552	7.04036	5.57603		-6.91968	1.21678	-0.149604
4	5.13284	4.83687	7.29835		-3.78086	1.31973	0.7659
5	-23.2967	-14.9045	-2.33059		-29.5319	-16.6349	-19.6173
6	1.5511	3.62703	11.9276		11.0809	5.83659	1.3021
7	-15.9597	-8.60559	-6.40299		-25.2451	-21.66	-11.7064
8	14.1484	7.57391	3.0398		-9.11716	-8.05701	-4.48109
9	-7.77284	-8.0518	-5.70693		-28.6853	-23.8565	-20.5428
10	0.433853	-6.28289	-0.709706		-18.1972	-17.6373	-14.4667
11	-2.92239	-12.2931	-3.15869		-13.7204	-2.80143	0.0293979
12	-10.8151	4.28392	7.13476		-10.6756	3.47453	-3.94038
13	5.85024	4.78246	3.68409		-0.616203	-24.1925	-9.56946
14	5.71087	4.14923	2.05723		7.34475	7.80488	1.20653
15	16.2377	22.3658	12.2833		4.43316	5.34842	-2.86198
16	-0.56752	0.105296	1.71696		3.76587	-1.97728	-4.41008
17	4.38594	6.77108	5.88644		0.468322	-1.76729	-4.73265
18	5.12918	-3.24084	1.24365		-14.071	-12.4074	-12.1078
19	-2.08469	4.39243	3.19594		6.96585	-4.68261	-6.01077
20	2.23872	7.07689	1.25497		-5.24948	-7.02326	-6.73993
21	-0.628022	-11.8268	-7.76213		-1.11566	-11.7621	-13.1134
